# Supplementary material
Source: PubMed Central journal article supplement (PMC4528054)
Supplement: cr201580x3.pdf [file cr201580x3.pdf]

Figure S3

A

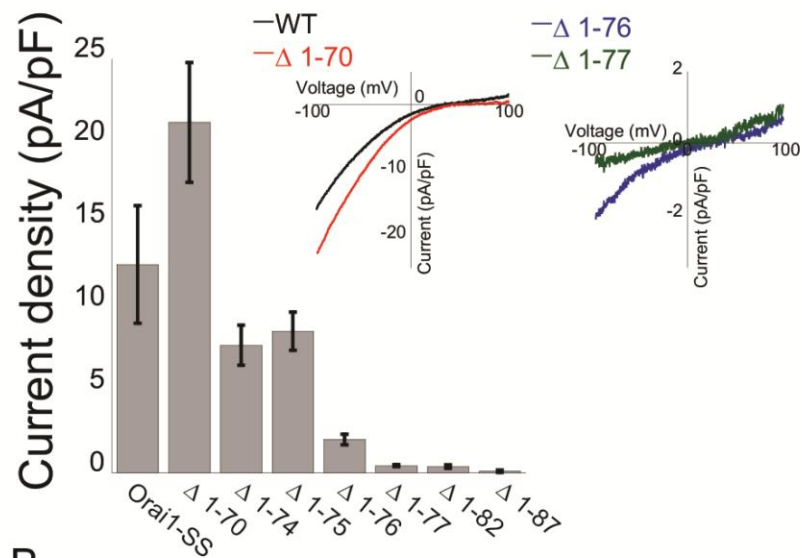

B

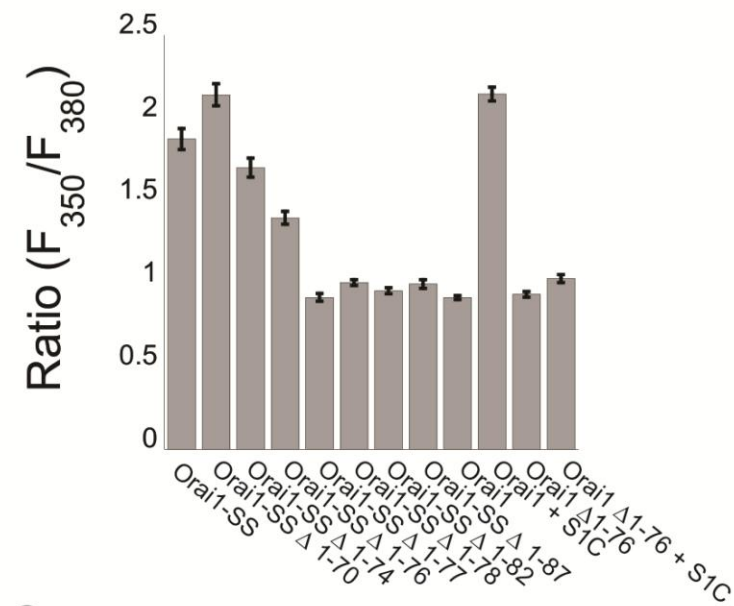

C

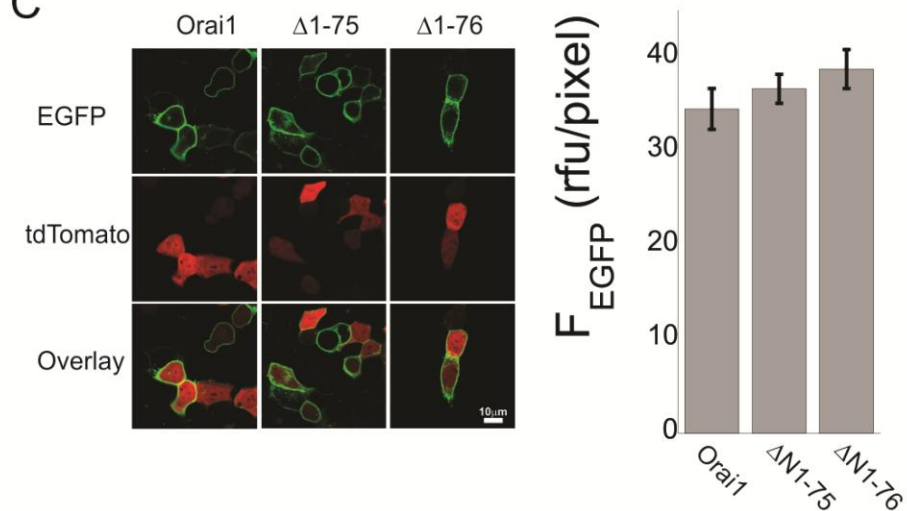

**Figure S3. N-terminal truncations beyond arginine 77 of the N' terminal region of Orai1 abolish channel activation by tethered STIM1 fragments.** (A) Left, summary of current densities recorded from cells expressing Orai1-SS-EGFP or the indicated N terminal deletion mutants Orai1-SS-EGFP  $\Delta N_{1-70}$ ,  $\Delta N_{1-74}$ ,  $\Delta N_{1-75}$ ,  $\Delta N_{1-76}$ ,  $\Delta N_{1-77}$ ,  $\Delta N_{1-78}$ ,  $\Delta N_{1-82}$  and  $\Delta N_{1-87}$  (n=3-7 cells). Right, representative plots of the current-voltage relationship of currents recorded from cells expressing Orai1-SS-EGFP, Orai1-SS-EGFP  $\Delta N_{1-70}$ , Orai1-SS-EGFP  $\Delta N_{1-76}$  and Orai1-SS-EGFP  $\Delta N_{1-77}$ . (B) Basal  $Ca^{2+}$  levels measured from HEK293 cells expressing Orai1-SS-EGFP or the indicated N terminal deletion mutants Orai1-SS-EGFP  $\Delta N_{1-70}$ ,  $\Delta N_{1-74}$ ,  $\Delta N_{1-75}$ ,  $\Delta N_{1-76}$ ,  $\Delta N_{1-77}$ ,  $\Delta N_{1-78}$ ,  $\Delta N_{1-82}$  and  $\Delta N_{1-87}$  or from cells expressing Orai1-EGFP or Orai1-EGFP  $\Delta N_{1-76}$  with or without mCherry-S1C (n=23-76 cells, \*\*\* p<0.001). (C) left - Orai1 N terminal deletion mutants localize to cell surface. Fluorescent images of HEK293 cells expressing Orai1-EGFP, Orai1-EGFP  $\Delta N_{1-75}$  or Orai1-EGFP  $\Delta N_{1-75}$  together with td-Tomato (as a marker for cytosol and nucleus regions). Right- Quantitation of expression levels for  $\Delta N$  Orai1 constructs (n = 6 regions).
