# Supplementary material
Source: PubMed Central journal article supplement (PMC4528054)
Supplement: cr201580x5.pdf [file cr201580x5.pdf]

## Figure S5

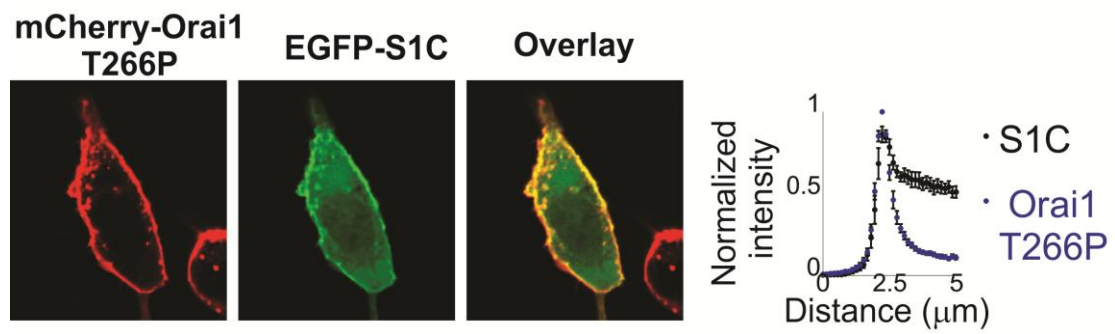

**Figure S5. STIM1 fragment interacts with the Orai1 T266P mutant.** (A) Representative fluorescent images of cells expressing EGFP-S1C together with mCherry-Orai1 T266P. (B) Summary of normalized intensity values across the plasma membrane and intracellular regions (n=13 cells).
